# Supplementary material
Source: publisher figshare collection journal article supplement (https://frontiersin.figshare.com/ndownloader/files/34315379)
Supplement: Supplementary file [file 34315379]

**Table of contents:**

**Supplementary Table 1**

**Supplementary Table 2**

**Questionnaire**

**Supplementary Table 1. Variables involved in the present study**

|                                                          | <b>Categories</b>                                  | <b>Subcategories</b>                | <b>Options</b>                                                           |
|----------------------------------------------------------|----------------------------------------------------|-------------------------------------|--------------------------------------------------------------------------|
| <b>Oral health literacy</b>                              | <b>HKREAL-30</b>                                   | -                                   | Can read the word                                                        |
|                                                          | <b>HKREALD-30-Understand</b>                       | -                                   | Understood the word                                                      |
| <b>Parents' oral health status and related factors</b>   | <b>Parents' oral health status self-assessment</b> | Self-reported health of teeth       |                                                                          |
|                                                          |                                                    | Self-reported health of gums        |                                                                          |
|                                                          | <b>Parents' oral health related behavior</b>       | Frequency of brushing teeth         |                                                                          |
|                                                          |                                                    | Frequency of flossing teeth         |                                                                          |
|                                                          | <b>Parents' oral health related knowledge</b>      | Dental visit                        |                                                                          |
|                                                          |                                                    | Fluoride application                |                                                                          |
|                                                          |                                                    | Sealants application                |                                                                          |
|                                                          |                                                    | Child's teeth clean                 |                                                                          |
|                                                          |                                                    | Child's teeth healthy               | The score ranges from 1 to 5, and a higher score indicates more positive |
|                                                          | <b>Parents' oral health-related attitudes</b>      | Child's teeth get brushed regularly |                                                                          |
|                                                          |                                                    | Child visit dentist regularly       |                                                                          |
| <b>Children's oral health status and related factors</b> | <b>Parents' attitudes toward children's diet</b>   | Whether the food is healthy         |                                                                          |
|                                                          |                                                    | The calories                        |                                                                          |
|                                                          | <b>Children's oral health status assessment</b>    | The sugar content                   |                                                                          |
|                                                          |                                                    | Child's health of teeth             |                                                                          |
|                                                          |                                                    | Child's health of gums              |                                                                          |
|                                                          | <b>Children' oral health related behavior</b>      | Frequency of brushing teeth         |                                                                          |
|                                                          |                                                    | Frequency of flossing teeth         |                                                                          |
|                                                          |                                                    | Dental visit                        |                                                                          |

**Supplementary Table 2: Overview of the parents' and children's background characteristics**

|            | Background characteristics   | Number | Percentages (%) |
|------------|------------------------------|--------|-----------------|
| Parents'   | Relationship to the child:   |        |                 |
|            | - Father                     | 125    | 30.8            |
|            | - Mother                     | 281    | 69.2            |
|            | Highest educational degree:  |        |                 |
|            | - Middle school              | 4      | 0.9             |
|            | - High                       | 9      | 2.2             |
|            | - Technical school           | 2      | 0.5             |
|            | - Junior college             | 43     | 10.6            |
|            | - Bachelor                   | 156    | 38.4            |
|            | - Master and/or above        | 192    | 47.3            |
|            | Employment:                  |        |                 |
|            | - Working full-time          | 373    | 91.9            |
|            | - Working part-time          | 4      | 1.0             |
|            | - Stay-at-home               | 18     | 4.4             |
|            | - Other                      | 11     | 2.7             |
| Children's | Combined family income/year: |        |                 |
|            | - under 200k                 | 137    | 35.4            |
|            | - 300k-500k                  | 206    | 53.2            |
|            | - 500k-700k                  | 26     | 6.7             |
|            | - 700k-8k                    | 16     | 4.1             |
|            | - more than 900k             | 2      | 0.5             |
|            | Gender:                      |        |                 |
|            | - male                       | 210    | 51.7            |
|            | - female                     | 196    | 48.3            |

## Questionnaire

### Peking University School and Hospital of Stomatology—Parent Survey

Thank you very much for answering these questions!

Date: \_\_\_\_\_ Year \_\_\_\_ Month \_\_\_\_ Day ID: ☐☐☐☐

Child's Name: \_\_\_\_\_

Child's Gender: \_\_\_\_\_

Child's BD: \_\_\_\_\_ Year \_\_\_\_\_ Month \_\_\_\_\_ Date

Child's Height: \_\_\_\_\_

Child's Weight: \_\_\_\_\_

Parent's age: \_\_\_\_\_

1. What is your relationship to the child? (Please choose only one answer)

- 1) ☐ Father 2) ☐ Mother  
3) ☐ Grandparent 4) ☐ Relative  
5) ☐ other

2. What is your employment status? (Please choose only one answer)

- 1) ☐ Working full-time 2) ☐ Working part-time  
3) ☐ Seeking employment 4) ☐ Stay-at-home  
5) ☐ Other

3. What is your highest academic degree? (Please choose only one answer)

- 1) ☐ Elementary school 2) ☐ Middle school 3) ☐ High school  
4) ☐ Technical school  
5) ☐ Junior college 6) ☐ Bachelor 7) ☐ Master and/or above

### Here are some questions about parent's dental health and visits:

4. How would describe the health of your teeth and gum? (Please choose only one answer for each question)

- |          | 1                              | 2                        | 3                        | 4                        | 5                        |
|----------|--------------------------------|--------------------------|--------------------------|--------------------------|--------------------------|
|          | Excellent                      | Very good                | Good                     | Fair                     | Poor                     |
| 1) Teeth | ..... <input type="checkbox"/> | <input type="checkbox"/> | <input type="checkbox"/> | <input type="checkbox"/> | <input type="checkbox"/> |
| 2) Gum   | ..... <input type="checkbox"/> | <input type="checkbox"/> | <input type="checkbox"/> | <input type="checkbox"/> | <input type="checkbox"/> |

5. How often do you brush your teeth? (Please choose only one answer)

- 1) ☐ Never                      2) ☐ 1x week or less                      3) ☐ 3x-4x week  
 4) ☐ 1x day                      5) ☐ 2x day or more

6. How often do you floss your teeth? **(Please choose only one answer)**

- 1) ☐ Never                      2) ☐ 1x week or less                      3) ☐ 3x-4x week  
 4) ☐ 1x day                      5) ☐ 2x day or more

7. Did you visit the dentist during the past year? **(Please choose only one answer)**

- 1) ☐ Yes                      2) ☐ No

8. If NO, what is the reason? **(Please choose only one answer)**

- 1) ☐ I did not have time.  
 2) ☐ Dental treatments are too expensive.  
 3) ☐ I think all my teeth are good.  
 4) ☐ I have some small dental issues, but they do not bother me. I will have them taken care of when they become symptomatic.

9. Please think about the dental care you received in the past, and select all of them.

**(May choose more than one answer)**

- 1) ☐ Check-ups                      2) ☐ Cleanings  
 3) ☐ Fillings                      4) ☐ Teeth pulled  
 5) ☐ Crowns                      6) ☐ RCT  
 7) ☐ Braces

**Here are some questions about the child's dental health and visits:**

10. How would describe the health of your child's teeth and gum? ? **(Please choose only one answer for each question)**

- |                | 1<br>Excellent           | 2<br>Very good           | 3<br>Good                | 4<br>Fair                | 5<br>Poor                |
|----------------|--------------------------|--------------------------|--------------------------|--------------------------|--------------------------|
| 1) Teeth ..... | <input type="checkbox"/> | <input type="checkbox"/> | <input type="checkbox"/> | <input type="checkbox"/> | <input type="checkbox"/> |
| 2) Gum .....   | <input type="checkbox"/> | <input type="checkbox"/> | <input type="checkbox"/> | <input type="checkbox"/> | <input type="checkbox"/> |

11. How often do your child's teeth get brushed ? **(Please choose only one answer)**

- 1) ☐ Never                      2) ☐ 1x week or less                      3) ☐ 3x-4x week  
 4) ☐ 1x day                      5) ☐ 2x day or more

12. How often do your child's teeth get flossed? **(Please choose only one answer)**

- 1) ☐ Never                      2) ☐ 1x week or less                      3) ☐ 3x-4x week  
 4) ☐ 1x day                      5) ☐ 2x day or more

13. Have you done any of the following? (**Please choose only one answer for each question**)

- |                                 | 5                        | 4                        | 3                        | 2                        | 1                        |
|---------------------------------|--------------------------|--------------------------|--------------------------|--------------------------|--------------------------|
|                                 | Every day                | Every week               | Sometimes                | Occasionally             | Never                    |
| 1) Help my child brush.....     | <input type="checkbox"/> | <input type="checkbox"/> | <input type="checkbox"/> | <input type="checkbox"/> | <input type="checkbox"/> |
| 2) Check after my child brushed | <input type="checkbox"/> | <input type="checkbox"/> | <input type="checkbox"/> | <input type="checkbox"/> | <input type="checkbox"/> |

14. How often did your child see a dentist in the past? (**Please choose only one answer**)

- 1) ☐ When there was a problem
- 2) ☐ 1x every 2 years
- 3) ☐ 1x every 1 year
- 4) ☐ 1x every 6 monts

15. Please think about what dental care your child has received in the past. (**May choose more than one answer**)

- |                                                               |                                          |
|---------------------------------------------------------------|------------------------------------------|
| 1) <input type="checkbox"/> Check-ups                         | 2) <input type="checkbox"/> Cleanings    |
| 3) <input type="checkbox"/> Fillings                          | 4) <input type="checkbox"/> Teeth pulled |
| 5) <input type="checkbox"/> Crowns                            | 6) <input type="checkbox"/> RCT          |
| 7) <input type="checkbox"/> Dental care in the operating room | 8) <input type="checkbox"/> Braces       |

16. Why did you bring your child to a dentist? (**Please choose only one answer**)

- 1) ☐ Check-ups
- 2) ☐ Tooth pain
- 3) ☐ Saw something different

17. What dental care do you think your child would need?

- |                                                               |                                          |
|---------------------------------------------------------------|------------------------------------------|
| 1) <input type="checkbox"/> Check-ups                         | 2) <input type="checkbox"/> Cleanings    |
| 3) <input type="checkbox"/> Fillings                          | 4) <input type="checkbox"/> Teeth pulled |
| 5) <input type="checkbox"/> Crowns                            | 6) <input type="checkbox"/> RCT          |
| 7) <input type="checkbox"/> Dental care in the operating room |                                          |
| 8) <input type="checkbox"/> Fluoride and sealant              |                                          |
| 9) <input type="checkbox"/> Braces                            |                                          |

18. How often during the last 24 hours did your child have the following food?

|                           |                  |                        |
|---------------------------|------------------|------------------------|
| Milk_____times            | Yogurt_____times | Cereal_____times       |
| Carbonated drink____times | Fruits____times  | Formula milk_____times |

Noodles\_\_\_\_\_times                      Cakes\_\_\_\_\_times                      Soup\_\_\_\_\_times  
 Fish\_\_\_\_\_times      Bread\_\_\_\_\_times      Crackers\_\_\_\_\_times  
 Beans\_\_\_\_\_times                      Rice\_\_\_\_\_times                      Dried fruits\_\_\_\_\_times  
 Eggs\_\_\_\_\_times      French fries\_\_\_\_\_times      Ice cream\_\_\_\_\_times  
 Nuts\_\_\_\_\_times      Chocolate\_\_\_\_\_times      Butter\_\_\_\_\_times  
 Candy\_\_\_\_\_times                      Cheese\_\_\_\_\_times                      Energy drinks\_\_\_\_\_times  
 Meat such as pork, beef, and chicken\_\_\_\_\_times

Please list any other food you child ate in the past 24 hours: \_\_\_\_\_

19. Does your child usually eat breakfast? **(Please choose only one answer)**

- 1) ☐ Yes                      2) ☐ No

20. When you eat out, how much do the followings influence your decision: **(Please choose only one answer for each question)**

|                                | 1                        | 2                        | 3                        | 4                        | 5                        |
|--------------------------------|--------------------------|--------------------------|--------------------------|--------------------------|--------------------------|
|                                | Not important at all     |                          |                          |                          | Very important           |
| 1) Costs                       | <input type="checkbox"/> | <input type="checkbox"/> | <input type="checkbox"/> | <input type="checkbox"/> | <input type="checkbox"/> |
| 2) Whether the food is healthy | <input type="checkbox"/> | <input type="checkbox"/> | <input type="checkbox"/> | <input type="checkbox"/> | <input type="checkbox"/> |
| 3) Calories                    | <input type="checkbox"/> | <input type="checkbox"/> | <input type="checkbox"/> | <input type="checkbox"/> | <input type="checkbox"/> |
| 4) Sugar contains              | <input type="checkbox"/> | <input type="checkbox"/> | <input type="checkbox"/> | <input type="checkbox"/> | <input type="checkbox"/> |

21. Please tell me for each of the following sentences how much you agree with it?  
**(Please choose only one answer for each question)**

|                                                                        | 1                        | 2                        | 3                        | 4                        | 5                        |
|------------------------------------------------------------------------|--------------------------|--------------------------|--------------------------|--------------------------|--------------------------|
|                                                                        | Disagree strongly        |                          |                          |                          | Agree strongly           |
| 1) My child has a toothache or pain currently                          | <input type="checkbox"/> | <input type="checkbox"/> | <input type="checkbox"/> | <input type="checkbox"/> | <input type="checkbox"/> |
| 2) My child's teeth hurt when she/he eats/drinks something cold or hot | <input type="checkbox"/> | <input type="checkbox"/> | <input type="checkbox"/> | <input type="checkbox"/> | <input type="checkbox"/> |
| 3) My child's teeth hurt when she/he eats/drinks something sweet.      | <input type="checkbox"/> | <input type="checkbox"/> | <input type="checkbox"/> | <input type="checkbox"/> | <input type="checkbox"/> |
| 4) My child's teeth hurt when she/he bites/chews.                      | <input type="checkbox"/> | <input type="checkbox"/> | <input type="checkbox"/> | <input type="checkbox"/> | <input type="checkbox"/> |
| 5) My child has pain when she/he opens her/him mouth wide.             | <input type="checkbox"/> | <input type="checkbox"/> | <input type="checkbox"/> | <input type="checkbox"/> | <input type="checkbox"/> |
| 6) My child sometimes wakes up at night with a toothache.              | <input type="checkbox"/> | <input type="checkbox"/> | <input type="checkbox"/> | <input type="checkbox"/> | <input type="checkbox"/> |
| 7) My child sometimes has a toothache at school.                       | <input type="checkbox"/> | <input type="checkbox"/> | <input type="checkbox"/> | <input type="checkbox"/> | <input type="checkbox"/> |
| 8) My child sometimes misses a day of school because of a toothache.   | <input type="checkbox"/> | <input type="checkbox"/> | <input type="checkbox"/> | <input type="checkbox"/> | <input type="checkbox"/> |
| 9) My child has a nice smile.                                          | <input type="checkbox"/> | <input type="checkbox"/> | <input type="checkbox"/> | <input type="checkbox"/> | <input type="checkbox"/> |
| 10) My child is happy with her/his teeth.                              | <input type="checkbox"/> | <input type="checkbox"/> | <input type="checkbox"/> | <input type="checkbox"/> | <input type="checkbox"/> |
| 11) My child sometimes complains about her/his teeth.                  | <input type="checkbox"/> | <input type="checkbox"/> | <input type="checkbox"/> | <input type="checkbox"/> | <input type="checkbox"/> |

- 12) It is not sure that fluoride could prevent caries ☐ ☐☐☐ ☐
- 13) Sealant could prevent caries ☐ ☐☐☐ ☐

22. It is important to me **(Please choose only one answer for each question)**

- |                                                                   | 1                        | 2                        | 3                        | 4                        | 5                        |
|-------------------------------------------------------------------|--------------------------|--------------------------|--------------------------|--------------------------|--------------------------|
|                                                                   | Disagree<br>strongly     |                          |                          |                          | Agree<br>strongly        |
| 1) that my child has clean teeth                                  | <input type="checkbox"/> | <input type="checkbox"/> | <input type="checkbox"/> | <input type="checkbox"/> | <input type="checkbox"/> |
| 2) that my child has healthy teeth                                | <input type="checkbox"/> | <input type="checkbox"/> | <input type="checkbox"/> | <input type="checkbox"/> | <input type="checkbox"/> |
| 3) that my child's teeth get brushed<br>regularly                 | <input type="checkbox"/> | <input type="checkbox"/> | <input type="checkbox"/> | <input type="checkbox"/> | <input type="checkbox"/> |
| 4) that my child sees a dentist regularly for<br>check-up visits. | <input type="checkbox"/> | <input type="checkbox"/> | <input type="checkbox"/> | <input type="checkbox"/> | <input type="checkbox"/> |

23. Do you know what could protect your child's teeth? **(Please only choose one answer)**

- 1) ☐ Yes                      2) ☐ No **(Please jump to question 25)**

24. Where did you acquire the knowledge? **(May choose more than one answer)**

- 1) ☐ School                      2) ☐ Seminars  
 3) ☐ Media (such as TV, newspaper)                      4) ☐ Social media  
 5) ☐ Previous dental experiences                      6) ☐ Other

25. Please check the option that best represents the total combined income of your family during the last year **(Please choose only one answer)**

- 1) ☐ under 100k    2) ☐ 100k-200k    3) ☐ 300k-400k  
 4) ☐ 400k-500k    5) ☐ 500k-600k    6) ☐ 600k-700k  
 7) ☐ 700k-800k    8) ☐ 800k-900k    9) ☐ 900k-1M  
 10) ☐ above 1M

Number:

Please read the following words, and check the one you can **read** or **understand**. **Do not guess.**

| Score:               | Please check the word you can read | Please check the word you understand |
|----------------------|------------------------------------|--------------------------------------|
|                      |                                    |                                      |
| 1. Smoking           | <input type="checkbox"/>           | <input type="checkbox"/>             |
| 2. Bacteria          | <input type="checkbox"/>           | <input type="checkbox"/>             |
| 3. Abscess           | <input type="checkbox"/>           | <input type="checkbox"/>             |
| 4. Bruxism           | <input type="checkbox"/>           | <input type="checkbox"/>             |
| 5. Diet              | <input type="checkbox"/>           | <input type="checkbox"/>             |
| 6. Implant           | <input type="checkbox"/>           | <input type="checkbox"/>             |
| 7. Dentition         | <input type="checkbox"/>           | <input type="checkbox"/>             |
| 8. Hyperemia         | <input type="checkbox"/>           | <input type="checkbox"/>             |
| 9. Fracture          | <input type="checkbox"/>           | <input type="checkbox"/>             |
| 10. Genetics         | <input type="checkbox"/>           | <input type="checkbox"/>             |
| 11. Sedation         | <input type="checkbox"/>           | <input type="checkbox"/>             |
| 12. Diagnosis        | <input type="checkbox"/>           | <input type="checkbox"/>             |
| 13. Avulsion         | <input type="checkbox"/>           | <input type="checkbox"/>             |
| 14. Enamel           | <input type="checkbox"/>           | <input type="checkbox"/>             |
| 15. Plaque           | <input type="checkbox"/>           | <input type="checkbox"/>             |
| 16. Mal-alignment    | <input type="checkbox"/>           | <input type="checkbox"/>             |
| 17. Canine           | <input type="checkbox"/>           | <input type="checkbox"/>             |
| 18. <b>Occlusion</b> | <input type="checkbox"/>           | <input type="checkbox"/>             |
| 19. Cyst             | <input type="checkbox"/>           | <input type="checkbox"/>             |
| 20. Panoramic        | <input type="checkbox"/>           | <input type="checkbox"/>             |
| 21. Sealant          | <input type="checkbox"/>           | <input type="checkbox"/>             |
| 22. Socket           | <input type="checkbox"/>           | <input type="checkbox"/>             |
| 23. Cellulitis       | <input type="checkbox"/>           | <input type="checkbox"/>             |
| 24. Braces           | <input type="checkbox"/>           | <input type="checkbox"/>             |
| 25. Porcelain        | <input type="checkbox"/>           | <input type="checkbox"/>             |
| 26. Orthodontics     | <input type="checkbox"/>           | <input type="checkbox"/>             |
| 27. Veneer           | <input type="checkbox"/>           | <input type="checkbox"/>             |
| 28. Erupt            | <input type="checkbox"/>           | <input type="checkbox"/>             |
| 29. Fluoride         | <input type="checkbox"/>           | <input type="checkbox"/>             |
| 30. Molar            | <input type="checkbox"/>           | <input type="checkbox"/>             |
